# Supplementary material
Source: PubMed Central journal article supplement (PMC6594400)
Supplement: NIHMS1532163-supplement-1.pdf [file NIHMS1532163-supplement-1.pdf]

**Table S1. Comparison of descriptive characteristics of those included and excluded from analyses**

|                                 | Included<br>% or<br>mean (SD) | Excluded<br>% or<br>mean (SD) | p-<br>value |
|---------------------------------|-------------------------------|-------------------------------|-------------|
| N                               | 5892                          | 922                           |             |
| eGFR, ml/min/1.73m <sup>2</sup> | 91 (18)                       | 87 (21)                       | <0.001      |
| Serum creatinine, mg/dL         | 0.83 (0.24)                   | 0.85 (0.42)                   | 0.185       |
| Serum cystatin C, mg/L          | 0.89 (0.22)                   | 0.96 (0.37)                   | <0.001      |
| Race (%)                        |                               |                               | <0.001      |
| White                           | 40                            | 30                            |             |
| Black                           | 27                            | 33                            |             |
| Hispanic                        | 22                            | 25                            |             |
| Chinese                         | 12                            | 12                            |             |
| Age, years                      | 62 (10)                       | 65 (11)                       | <0.001      |
| Male (%)                        | 48                            | 44                            | 0.07        |
| Income (%)                      |                               |                               | <0.001      |
| <\$20K                          | 21                            | 37                            |             |
| \$20K - \$39,999                | 27                            | 27                            |             |
| \$40K - \$74,999                | 27                            | 23                            |             |
| ≥ \$75K                         | 24                            | 13                            |             |
| Education (%)                   |                               |                               | <0.001      |
| <HS                             | 16                            | 29                            |             |
| =HS                             | 47                            | 46                            |             |
| >HS                             | 37                            | 25                            |             |
| BMI, kg/m <sup>2</sup>          | 28 (5)                        | 28 (5)                        | 0.397       |
| Diabetes prevalence (%)         | 12                            | 19                            | <0.001      |
| Hypertension prevalence (%)     | 44                            | 53                            | <0.001      |
| SBP, mmHg                       | 126 (21)                      | 132 (24)                      | <0.001      |
| DBP, mmHg                       | 72 (10)                       | 73 (11)                       | 0.062       |
| Smoking (%)                     |                               |                               | 0.102       |
| Never                           | 51                            | 49                            |             |
| Former                          | 37                            | 35                            |             |
| Current                         | 13                            | 16                            |             |
| UACR, mg/g                      | 5.1 (3.3, 10.2)               | 7.0 (4.0, 18.0)               | <0.001      |
