# Supplementary material
Source: PubMed Central journal article supplement (PMC6594400)
Supplement: NIHMS1532163-supplement-2.pdf [file NIHMS1532163-supplement-2.pdf]

**Table S2. Number and pattern of visits with eGFR measurement**

| 1            | 3 | 4 | 5 | N    | Median follow up time (IQR) |
|--------------|---|---|---|------|-----------------------------|
| Four visits  |   |   |   |      |                             |
| X            | X | X | X | 3830 | 9.39 (9.12, 9.71)           |
| Three visits |   |   |   |      |                             |
| X            | X | X |   | 962  | 4.80 (4.60, 5.06)           |
| X            | X |   | X | 325  | 9.42 (9.15, 9.71)           |
| X            |   | X | X | 248  | 9.40 (9.14, 9.69)           |
| Two visits   |   |   |   |      |                             |
| X            | X |   |   | 368  | 3.13 (2.99, 3.40)           |
| X            |   | X |   | 106  | 4.81 (4.62, 5.02)           |
| X            |   |   | X | 53   | 9.42 (9.32, 9.76)           |

Notes: Exams 1 through 5 occurred in the following respective years: 2000-2002, 2002-2004, 2004-2005, 2005-2007, and 2010-2011. eGFR was quantified only at Exams 1, 3, 4, and 5.
