# Supplementary material
Source: PubMed Central journal article supplement (PMC6594400)
Supplement: NIHMS1532163-supplement-3.pdf [file NIHMS1532163-supplement-3.pdf]

**Table S3. Association of neighborhood problems and social cohesion scores with baseline eGFR<60ml/min/1.73m<sup>2</sup>**

|                                                       | N    | eGFR<br><60ml/min/1.73m <sup>2</sup><br>N (%) | Model 1 <sup>c</sup><br>OR (95% CI) | Model 2 <sup>d</sup><br>OR (95% CI) | Model 3 <sup>e</sup><br>OR (95% CI) |
|-------------------------------------------------------|------|-----------------------------------------------|-------------------------------------|-------------------------------------|-------------------------------------|
| <b>Neighborhood Problems Score<sup>a</sup></b>        |      |                                               |                                     |                                     |                                     |
| All                                                   | 5892 | 475 (8)                                       | 0.94 (0.85, 1.04)                   | 0.95 (0.81, 1.12)                   | 0.93 (0.79, 1.09)                   |
| White                                                 | 2342 | 232 (10)                                      | 0.86 (0.72, 1.03)                   | 0.95 (0.73, 1.22)                   | 0.92 (0.71, 1.20)                   |
| Black                                                 | 1588 | 116 (7)                                       | 1.02 (0.83, 1.24)                   | 0.81 (0.59, 1.11)                   | 0.75 (0.55, 1.04)                   |
| Hispanic                                              | 1270 | 82 (7)                                        | 0.99 (0.81, 1.22)                   | 1.09 (0.77, 1.54)                   | 1.10 (0.77, 1.56)                   |
| Chinese                                               | 692  | 45 (7)                                        | 0.87 (0.57, 1.32)                   | 0.99 (0.59, 1.67)                   | 0.99 (0.58, 1.70)                   |
| <b>Neighborhood Social Cohesion Score<sup>b</sup></b> |      |                                               |                                     |                                     |                                     |
| All                                                   | 5892 | 475 (8)                                       | 1.04 (0.95, 1.15)                   | 0.93 (0.79, 1.08)                   | 0.95 (0.81, 1.12)                   |
| White                                                 | 2342 | 232 (10)                                      | 1.00 (0.86, 1.17)                   | 0.95 (0.75, 1.20)                   | 0.99 (0.77, 1.26)                   |
| Black                                                 | 1588 | 116 (7)                                       | 0.89 (0.74, 1.06)                   | 0.91 (0.69, 1.20)                   | 0.91 (0.68, 1.22)                   |
| Hispanic                                              | 1270 | 82 (7)                                        | 1.10 (0.84, 1.44)                   | 1.03 (0.69, 1.54)                   | 1.05 (0.70, 1.60)                   |
| Chinese                                               | 692  | 45 (7)                                        | 0.64 (0.39, 1.05)                   | 0.90 (0.51, 1.60)                   | 1.07 (0.57, 2.03)                   |

<sup>a</sup>The coefficients for the neighborhood problems score represent the difference in the odds of an eGFR<60ml/min/1.73m<sup>2</sup> for each standard deviation increase in the neighborhood score. The standard deviation of the neighborhood score is 0.20.

<sup>b</sup>The coefficients for the neighborhood social cohesion score represent the difference in the odds of an eGFR<60ml/min/1.73m<sup>2</sup> for each standard deviation decrease in the neighborhood score. The standard deviation of the neighborhood score is 0.22.

<sup>c</sup>Model 1 is unadjusted.

<sup>d</sup>Model 2 includes adjustment for age, gender, race/ethnicity (in models with total sample only), income, education, and MESA site.

<sup>e</sup>Model 3 includes additional adjustment for diabetes, hypertension, smoking, BMI, LDL, HDL, CRP, and UACR.

Abbreviations: OR, odds ratio; CI, confidence interval.
