# Supplementary material
Source: PubMed Central journal article supplement (PMC6594400)
Supplement: NIHMS1532163-supplement-4.pdf [file NIHMS1532163-supplement-4.pdf]

**Table S4. Association of neighborhood problems and social cohesion scores with baseline UACR>30mg/g**

|                                                       | N    | UACR<br>>30mg/g<br>N (%) | Model 1 <sup>c</sup><br>OR (95% CI) | Model 2 <sup>d</sup><br>OR (95% CI) | Model 3 <sup>e</sup><br>OR (95% CI) |
|-------------------------------------------------------|------|--------------------------|-------------------------------------|-------------------------------------|-------------------------------------|
| <b>Neighborhood Problems Score<sup>a</sup></b>        |      |                          |                                     |                                     |                                     |
| All                                                   | 5870 | 501 (9)                  | 1.10 (1.00, 1.21)                   | 1.03 (0.89, 1.18)                   | 1.00 (0.87, 1.15)                   |
| White                                                 | 2333 | 129 (6)                  | 1.28 (1.02, 1.61)                   | 1.19 (0.89, 1.59)                   | 1.15 (0.86, 1.55)                   |
| Black                                                 | 1580 | 164 (10)                 | 1.06 (0.90, 1.25)                   | 0.91 (0.71, 1.15)                   | 0.86 (0.67, 1.11)                   |
| Hispanic                                              | 1265 | 138 (11)                 | 1.02 (0.87, 1.19)                   | 1.10 (0.85, 1.43)                   | 1.08 (0.82, 1.42)                   |
| Chinese                                               | 692  | 70 (10)                  | 1.10 (0.81, 1.48)                   | 1.22 (0.84, 1.77)                   | 1.38 (0.92, 2.05)                   |
| <b>Neighborhood Social Cohesion Score<sup>b</sup></b> |      |                          |                                     |                                     |                                     |
| All                                                   | 5870 | 501 (9)                  | 0.79 (0.72, 0.87)                   | 0.97 (0.84, 1.12)                   | 1.00 (0.87, 1.16)                   |
| White                                                 | 2333 | 129 (6)                  | 0.90 (0.73, 1.11)                   | 1.05 (0.78, 1.40)                   | 1.11 (0.82, 1.49)                   |
| Black                                                 | 1580 | 164 (10)                 | 0.94 (0.81, 1.10)                   | 1.15 (0.92, 1.44)                   | 1.18 (0.92, 1.49)                   |
| Hispanic                                              | 1265 | 138 (11)                 | 0.89 (0.72, 1.10)                   | 0.87 (0.64, 1.19)                   | 0.89 (0.63, 1.25)                   |
| Chinese                                               | 692  | 70 (10)                  | 0.43 (0.29, 0.66)                   | 0.48 (0.30, 1.76)                   | 0.42 (0.26, 0.69)                   |

<sup>a</sup>The coefficients for the neighborhood problems score represent the difference in the odds of an UACR>30mg/g for each standard deviation increase in the neighborhood score. The standard deviation of the neighborhood score is 0.20.

<sup>b</sup>The coefficients for the neighborhood social cohesion score represent the difference in the odds of an UACR>30mg/g for each standard deviation decrease in the neighborhood score. The standard deviation of the neighborhood score is 0.22.

<sup>c</sup>Model 1 is unadjusted.

<sup>d</sup>Model 2 includes adjustment for age, gender, race/ethnicity (in models with total sample only), income, education, and MESA site.

<sup>e</sup>Model 3 includes additional adjustment for diabetes, hypertension, smoking, BMI, LDL, HDL, CRP, and UACR.

Abbreviations: OR, odds ratio; CI, confidence interval.
